## Acclimation to different thermal conditions in a northerly wintering shorebird is driven by body mass-related changes in organ size

F. Vézina, K. M. Jalvingh, A. Dekinga and T. Piersma

10.1242/jeb.02512

There was an error published in *J. Exp. Biol.* **209**, 3141-3154.

In paragraph 4 of the *Respirometry* section of the **Materials and methods**, the authors stated:

Therefore, energy consumption was estimated using a constant equivalent of 20 kJ l<sup>-1</sup> O<sub>2</sub> and then converted to watts using 1 W=0.2777 kJ (Gessaman and Nagy, 1988; Piersma et al., 1995; Piersma et al., 1996; Piersma et al., 2004; Weber and Piersma, 1996).

The sentence should have read:

Therefore, energy consumption was estimated using a constant equivalent of 20 kJ l<sup>-1</sup> O<sub>2</sub> and then converted to watts using 1 W=1 J s<sup>-1</sup> (Gessaman and Nagy, 1988; Piersma et al., 1995; Piersma et al., 1996; Piersma et al., 2004; Weber and Piersma, 1996).

The authors apologise for this error but assure readers that the values on energy use presented in the article have been properly calculated using 1 W=1 J s<sup>-1</sup>.
